# Supplementary material
Source: PubMed Central journal article supplement (PMC11105557)

a

ELAV

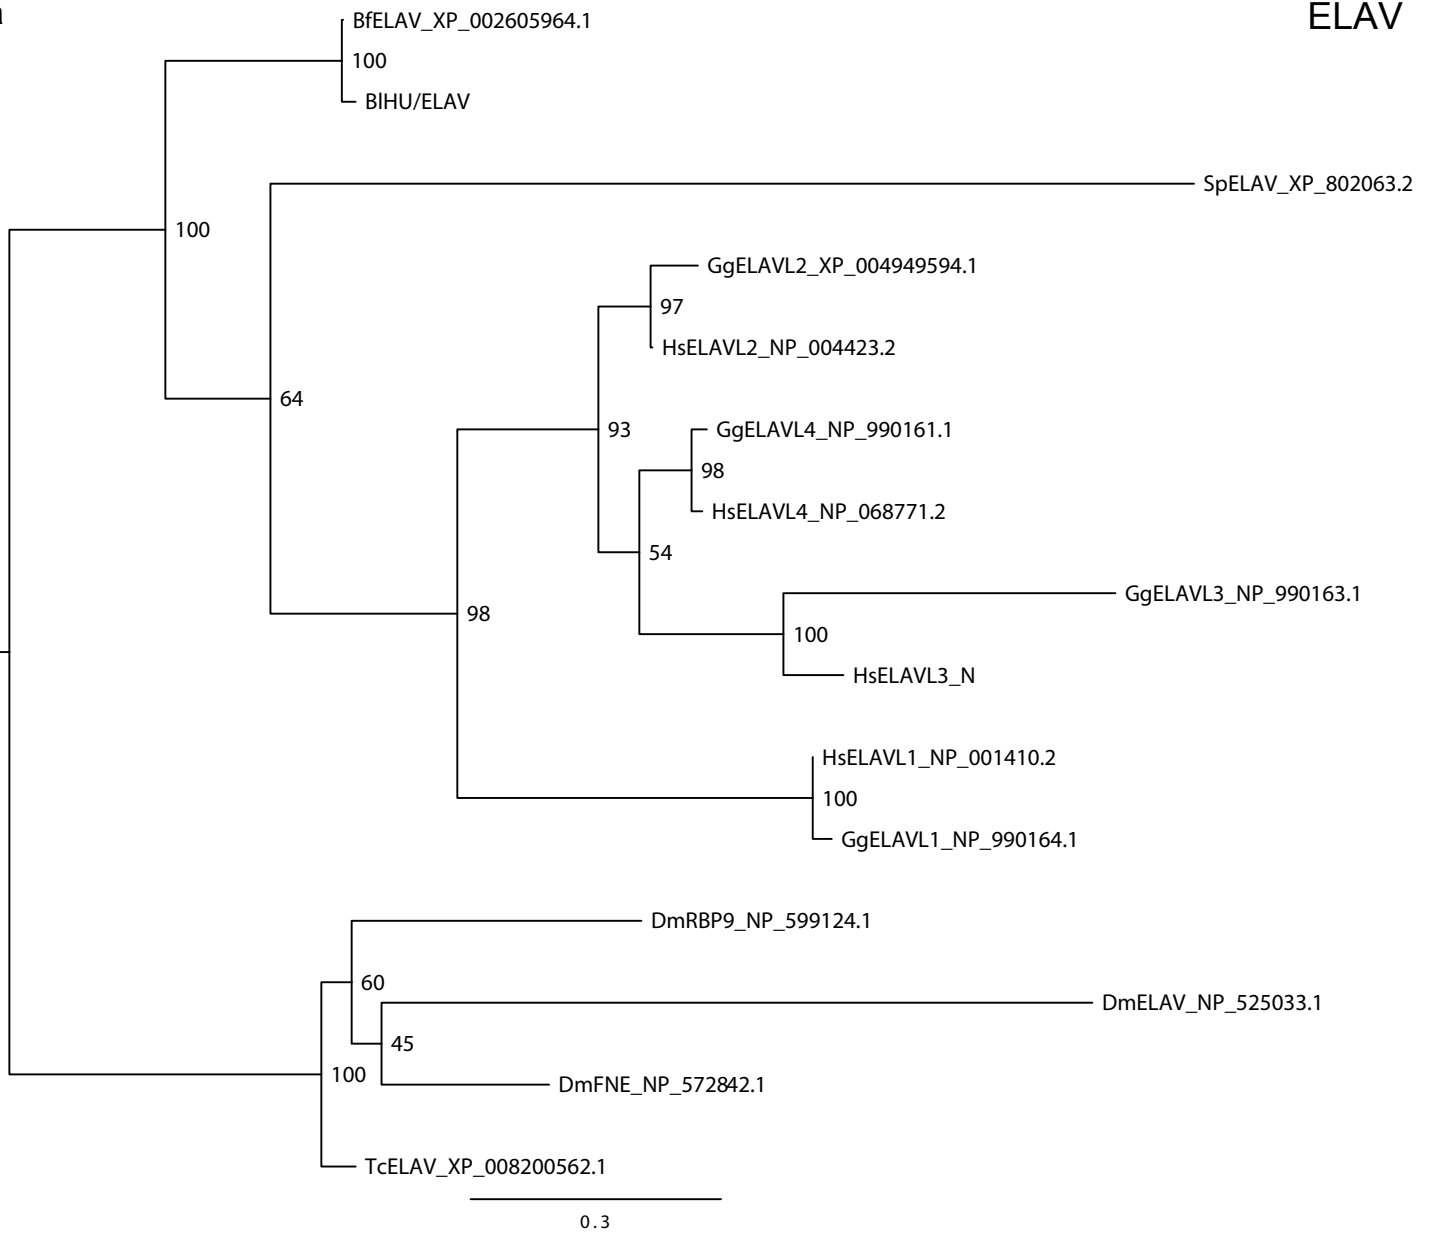

b

TLX

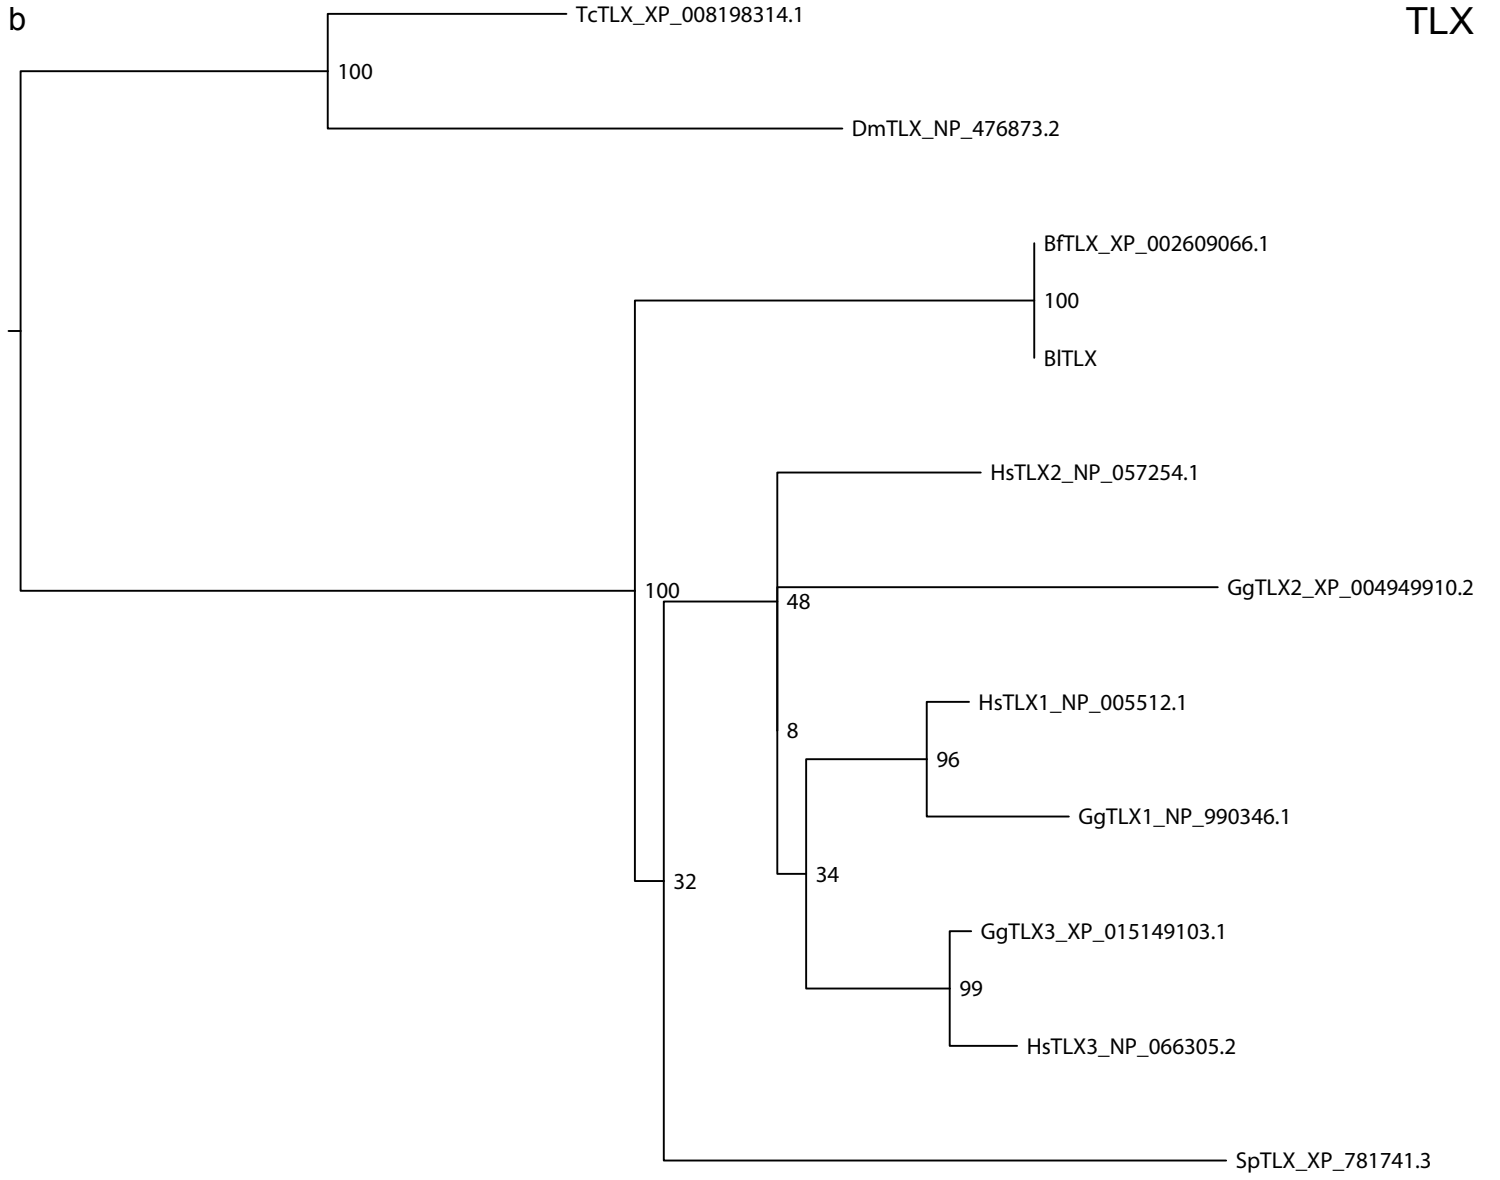

0.4

C

# SOXB1

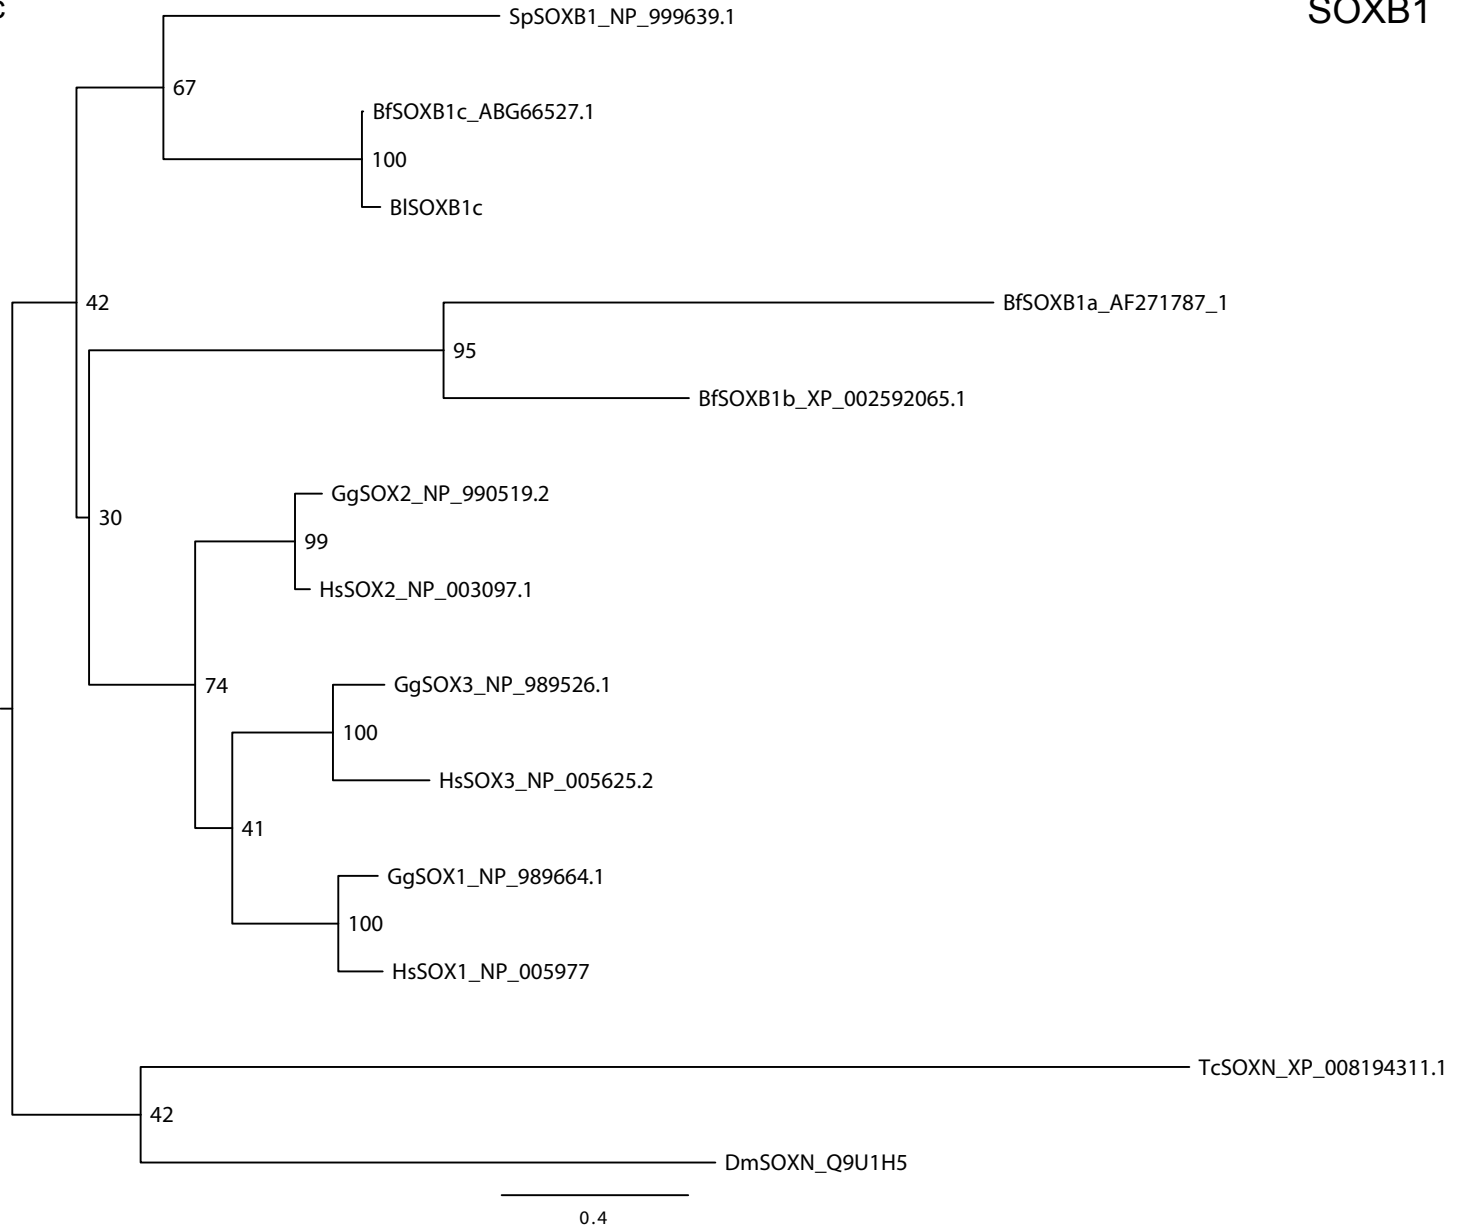

Supplement: 18_2017_2734_MOESM5_ESM.pdf [file 18_2017_2734_MOESM5_ESM.pdf]
